# Supplementary material
Source: PubMed Central journal article supplement (PMC3955731)
Supplement: NIHMS558120-supplement-1.pdf [file NIHMS558120-supplement-1.pdf]

Supplementary Figure 1

A

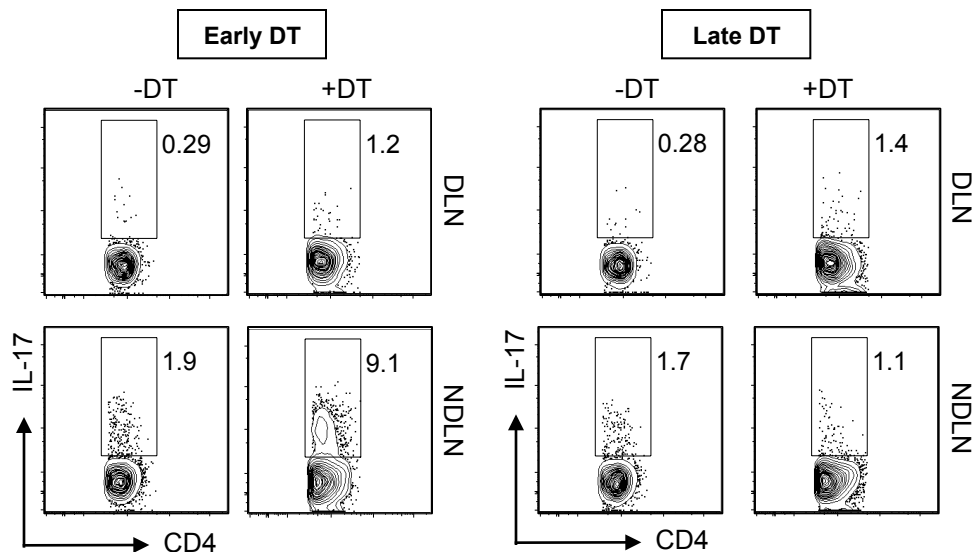

B

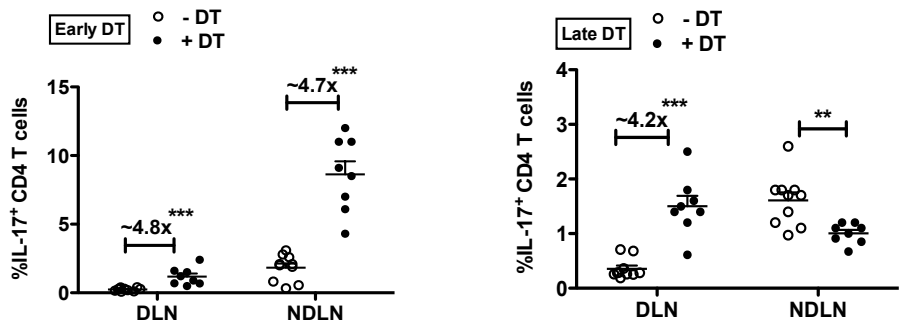

C

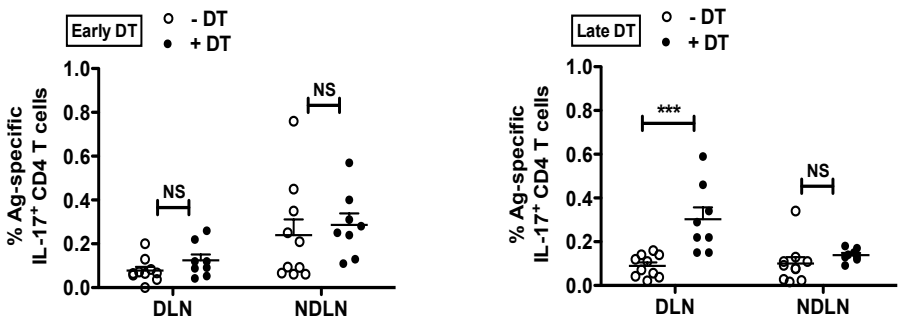

## Supplementary Figure Legends

### Supplementary Figure 1: T<sub>reg</sub> depletion results in increased IL-17<sup>+</sup> CD4 T cells

(A) Representative flow plots gated on CD4<sup>+</sup> T cells stained for the Th17 cytokine, IL-17. DLN and NDLN cells were isolated from *T. muris* infected mice treated with Early DT (left) or Late DT (right) approaches and analyzed at day 35. Cells were stimulated with PMA and Ionomycin for 12-16 hours in the presence of Monensin for cytokine secretion analysis.

(B) Percentages of IL-17<sup>+</sup> CD4 T cells in the DLN and NDLNs following T<sub>reg</sub> depletion in *T. muris* infected mice as discussed in (A). Fold induction of IL-17<sup>+</sup> CD4 T cells (ratio of +DT/-DT) indicated.

(C) Percentages of Ag-specific IL-17<sup>+</sup> CD4 T cells in the DLN and NDLNs following T<sub>reg</sub> depletion by Early DT (left) and Late DT (right) approaches in *T. muris* infected mice and analyzed at day 35. Cells were stimulated with *T. muris* antigen for 12-16 hours in the presence of Monensin for cytokine secretion analysis.

Each data point on the scatter plots represents an individual mouse with mean indicated. Data represent two independent experiments for both Early and Late DT treatments (n=8-10 mice per group).

\*\* $p < 0.01$ , \*\*\* $p < 0.001$ ; NS, not significant (Unpaired Student's *t*-test).

Supplementary Figure 2

A

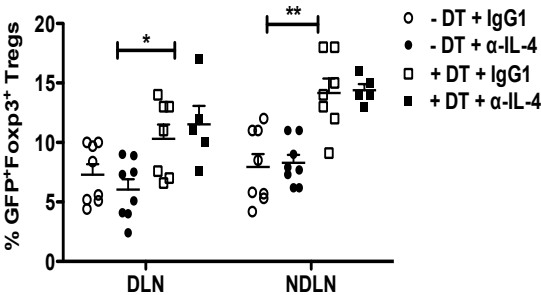

B

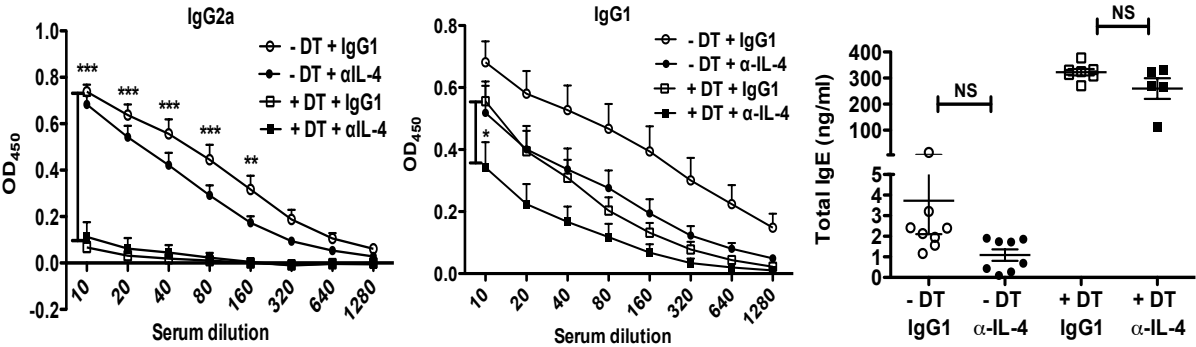

C

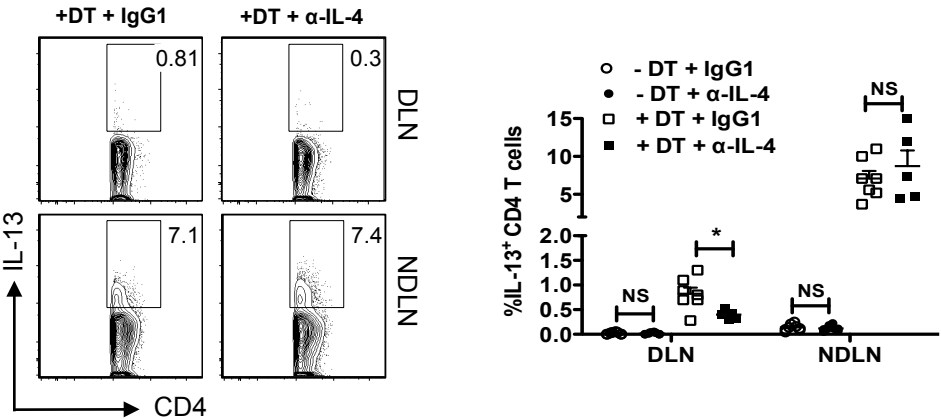

**Supplementary Figure 2: T<sub>reg</sub> recovery, humoral and cytokine responses following IL-4 blockade during low dose *T. muris* infection**

(A) T<sub>reg</sub> recovery at day 35 assessed by the percentages of GFP<sup>+</sup>Foxp3<sup>+</sup> T<sub>regs</sub>. Cells isolated from DLN and NDLN from *T. muris* infected mice that received  $\alpha$ -IL-4 (11B11) neutralizing antibody or isotype IgG1 control on days 2, 5 and 8, alongside the early DT treatments (d0-d8). Thus, the four treatment groups included: (-DT+IgG1, -DT+  $\alpha$ -IL-4, +DT+IgG1 and +DT+  $\alpha$ -IL-4).

(B) Parasite-specific IgG1, IgG2a and total IgE responses as assessed by ELISA of serum samples for mice treated as in (A).

(C) Representative flow plots gated on CD4<sup>+</sup> T cells stained for the Th2 cytokine, IL-13. DLN and NDLN cells were isolated from *T. muris* infected mice treated with IL-4 neutralizing antibody or IgG1 isotype alongside early T<sub>reg</sub> depletion and analyzed at day 35. Cells stimulated with PMA and Ionomycin for 12-16 hours in the presence of Monensin. Data represented for only the two DT treatment groups (+DT+IgG1 and +DT+  $\alpha$ -IL-4).

Each data point on scatter plots represents an individual mouse with mean indicated. Data represents two independent experiments (n=5-8mice per group)

For (B), \* $p$ <0.05, \*\* $p$ <0.01, \*\*\* $p$ <0.001 (2way ANOVA analysis),

For (A), (C), \* $p$ <0.05, \*\* $p$ <0.01, NS, non-significant (Unpaired Student's  $t$ -test).
